# Supplementary material for: Temporal variations of the hygroscopicity and mixing state of black carbon aerosols in a polluted megacity area
Source: Copernicus journal article supplement (doi:10.5194/acp-2018-602), 2018-06-25
Supplement: Supplementary file 1 [file acp-2018-602-supplement.pdf]

## 1 **Supplementary information**

### 2 **Instrument and operation**

3 **HTDMA:** Briefly, the custom-built HTDMA consists of two long DMAs (3081L,  
4 TSI Inc.), a humidifier (PD-50T-12MSS, Perma Pure Inc.), and a condensation particle  
5 counter (CPC, model 3771, TSI Inc.). Particles were dried to  $\sim 20\%$  RH using a  
6 diffusion drier, and then size-selected by first DMA, and humidified to  $\sim 85\%$  RH.  
7 The resulting humidified size distribution was scanned using the second DMA  
8 connected to a water based condensation particle counter (water-CPC, TSI 3782). The  
9 DMAs were operated with recirculating sheath flows and a sheath-to-sample flow rate  
10 of 10:1. The housing that hosts the DMAs was temperature controlled and kept at 20  
11 °C. With this setup, the GF of a particle can be calculated from the following equation:  
12  $GF = D_{RH}/D_0$ , where  $D_{RH}$  and  $D_0$  are the humidified and dried particle mobility diameter  
13 measured by the second and first DMA, respectively. Aerosol flow was set at 0.43  
14 L/min (the sum of the CPC (0.4 L/min) and the SP2 (0.03 L/min)). With this flow rate,  
15 the aerosol residence time in the humidifier was about 25s (Chan and Chan, 2005).  
16 Hygroscopicity was calibrated using  $(NH_4)_2SO_4$  particles.

17 **SP2:** SP2 detects incandescence and scattering signals of BC-containing particles  
18 induced by a 1064 nm Nd: YAG intracavity laser. If a particle was detected by the  
19 avalanche photodiode (APD) sensor but with no thermal radiation observed, the mass  
20 of rBC in the particle was below the SP2 incandescence detection limit. These particles  
21 were classified as purely scattering and assigned a size using the intensity of the APD  
22 detector signal and the PSL calibration response. The mass of rBC is proportional to  
23 the intensity of the laser-induced incandescence signal. Any measured particle with a  
24 detectable incandescence signal is treated as a BC-containing particle. The SP2 uses the  
25 maximum detected emission of thermal radiation (“incandescence”) to determine the  
26 rBC mass for individual BC-containing particles. For the BC-containing particles with  
27 core–shell structures, the coating thickness can be semi-qualitatively represented by the  
28 delay time of the LII peak ( $\Delta t$ ), which is defined as the elapsed time between the  
29 occurrence of the peak of the scattering signal and the peak of the incandescence signal;  
30 a positive value of this quantity indicates that the peak of the incandescence signal  
31 occurs after the peak of the scattering signal. In principle, the larger the  $\Delta t$  value is, the

32 more likely the rBC core has thicker coating. Therefore, the SP2 measurement is  
33 capable of examining whether a single particle contains rBC or not by detecting the  
34 ambient incandescence signal.

35 **SPAMS:** Particles in the size range of 0.2–2.0  $\mu\text{m}$  are first drawn into the vacuum  
36 through an aerodynamic focusing lens. Each particle is accelerated to a size-dependent  
37 aerodynamic velocity, which is calculated based on two continuous lasers (Nd: YAG;  
38 532 nm). The two lasers are fixed at a 6 cm distance and the scatter light is collected by  
39 two photomultiplier tubes (PMTs). When a particle arrives at the ion source region, a  
40 pulsed desorption–ionization laser (Qswitched Nd: YAG; 266 nm) is triggered. And a  
41 bipolar time-of-flight spectrometer records both positive and negative mass spectra for  
42 each single particle. In this work, the power of the desorption–ionization laser was set  
43 to  $\sim 0.6$  mJ per pulse. The vacuum aerodynamic diameter measurement is calibrated  
44 with monodisperse polystyrene latex spheres (Nanosphere Size Standards; Duke  
45 Scientific Corp.) with known diameters (0.2–2.0  $\mu\text{m}$ ).

46 All single-particle mass spectra acquired were converted to a list of peaks at each  
47 m/z by setting a minimum signal threshold of 20 arbitrary units above the baseline with  
48 TSI MS-Analyze software. The resulting peak lists together with other SPAMS data  
49 were imported into YAADA (version 2.11; [www.yaada.org](http://www.yaada.org)), a software toolkit for  
50 single-particle data analysis written in MATLAB (version R2012b).

51

52

53

54

55

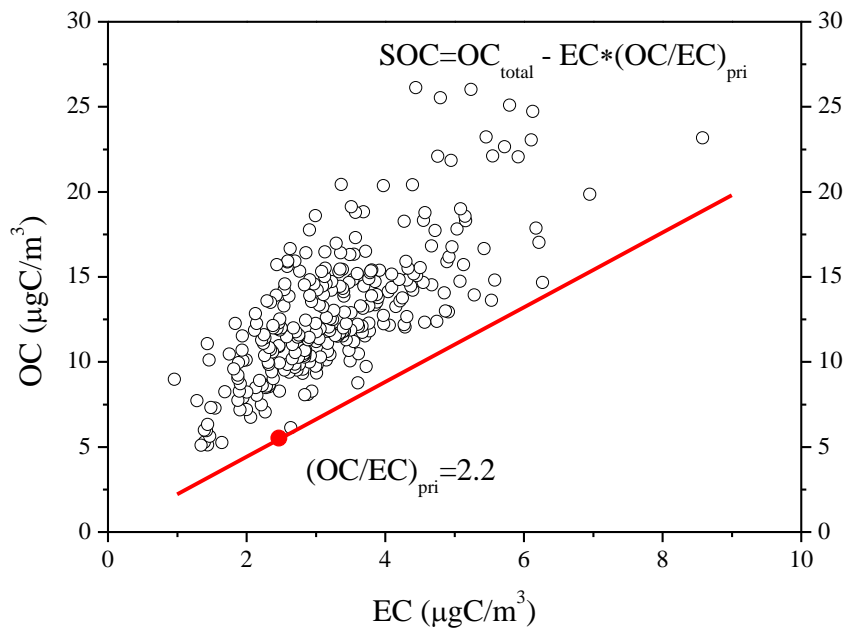

56

57 **Figure S1.** The scattering plot for the measured OC and EC concentration. The red line  
 58 represents the minimum value of OC/EC ratio.

59

60

61

62

63

64

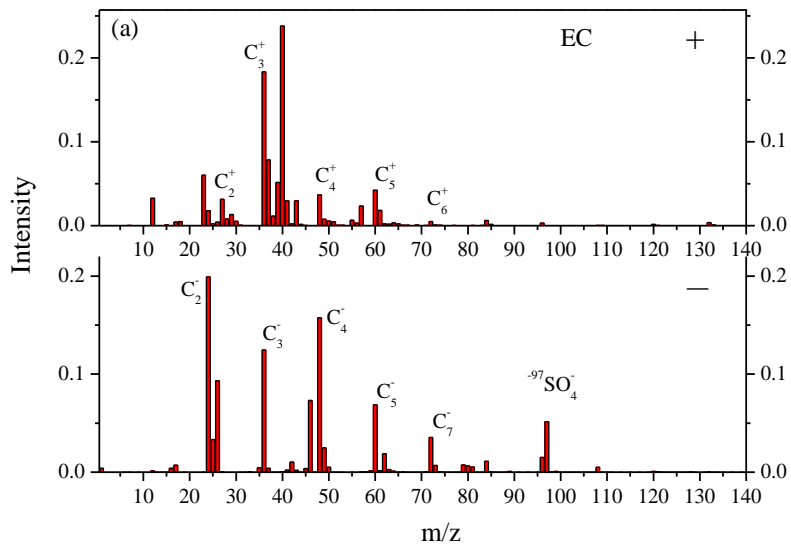

65

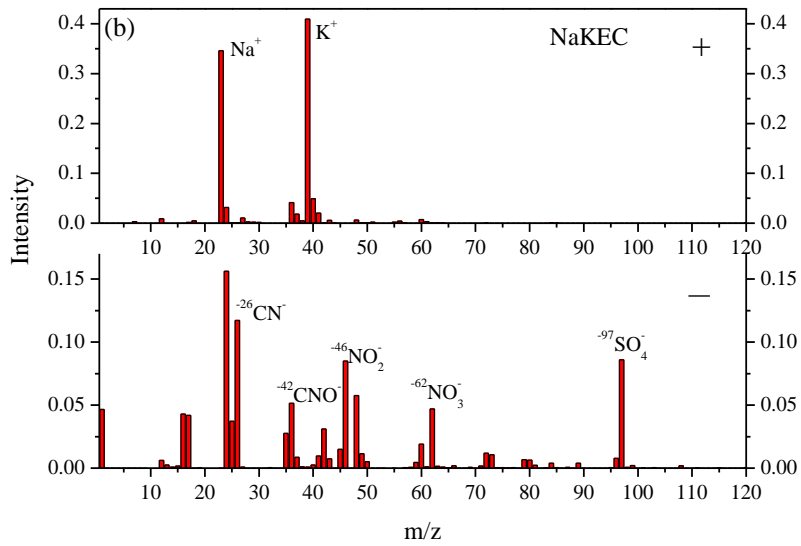

66

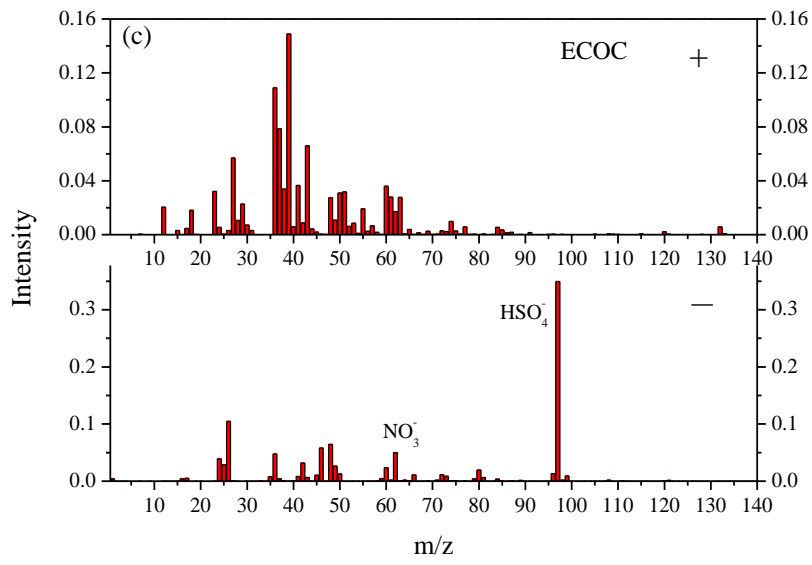

67

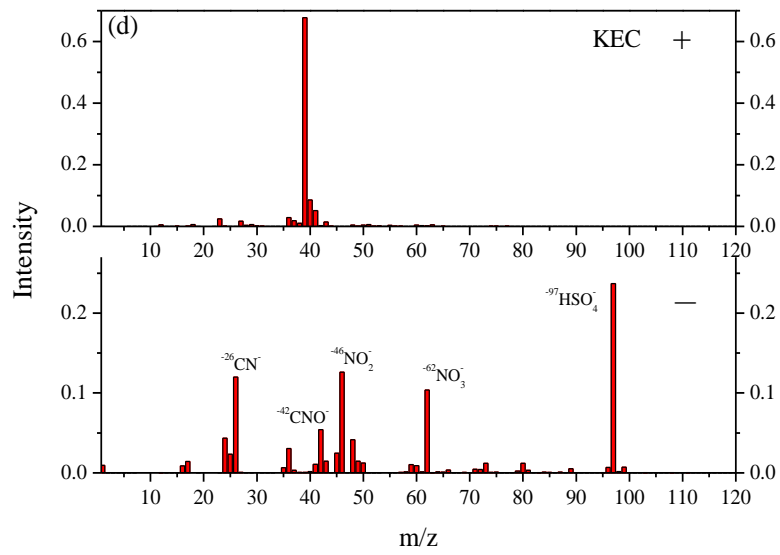

68

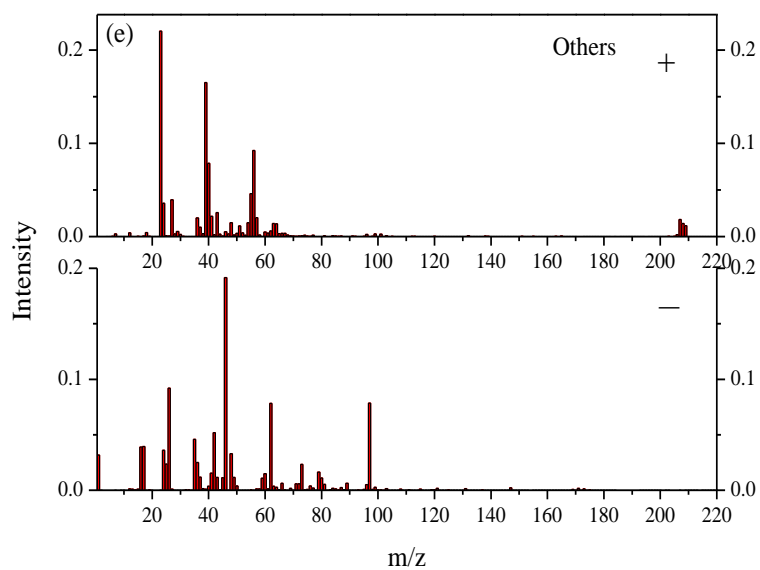

69

70 **Figure S2.** Averaged mass spectra of different types of BC-containing particles: (a) EC;  
71 (b) NaKEC; (c) ECOc; (d) KEC; (e) Others (the unit for the intensity is arbitrary).

72

73

74

75

76

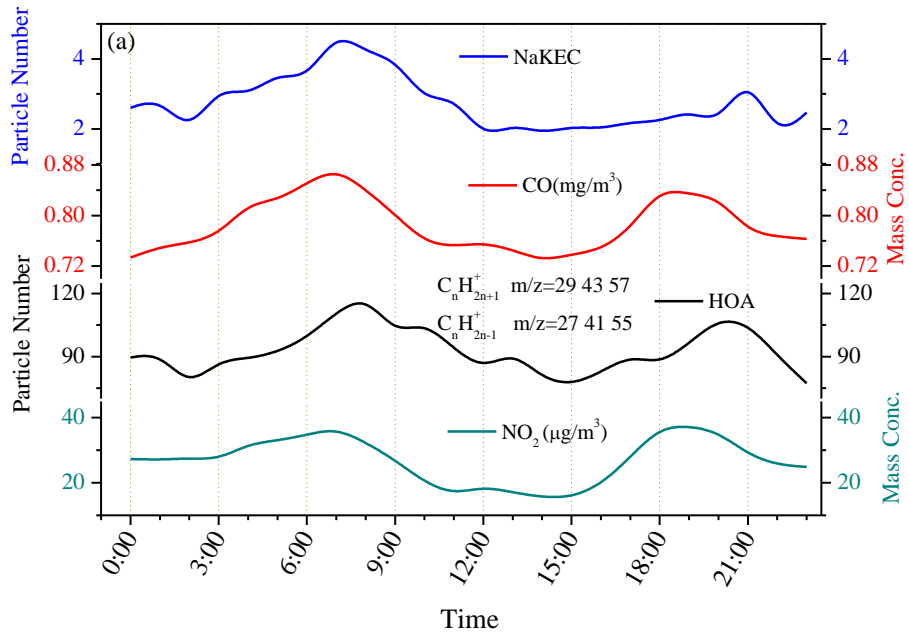

77

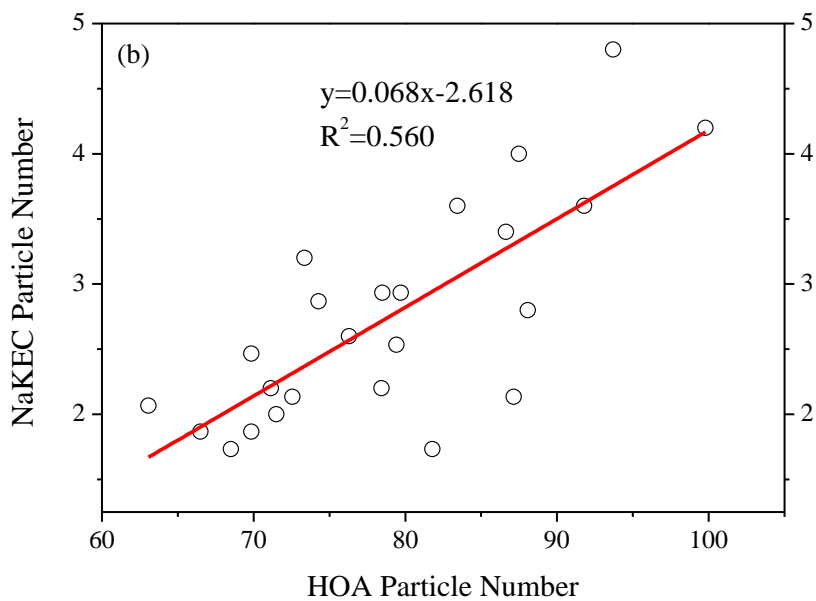

78

79 **Figure S3.** (a) Diurnal variation of NaKEC and HOA particle number sampled by  
 80 SPAMS, as well as CO and NO<sub>2</sub> concentrations; (b) Correlation between NaKEC and  
 81 HOA particles.

82

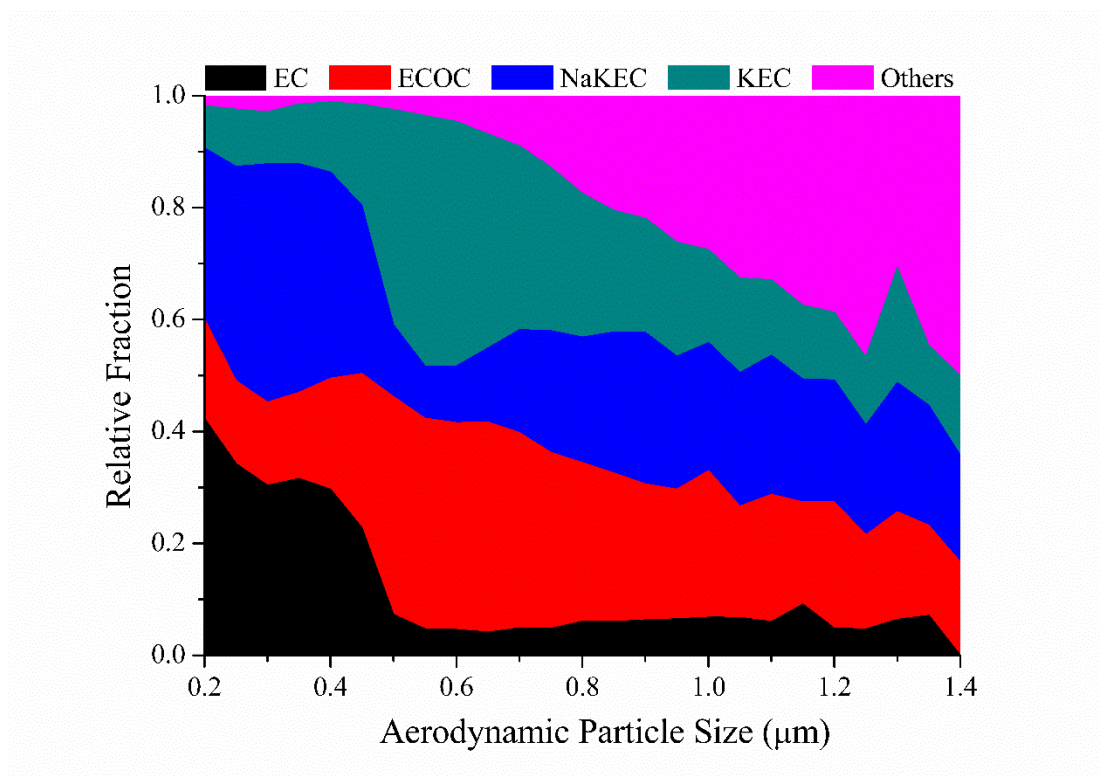

83

84 **Figure S4.** Relative fractions of five particle types as a function of particle size  
85 measured by SPAMS.

86

87

88

89

90



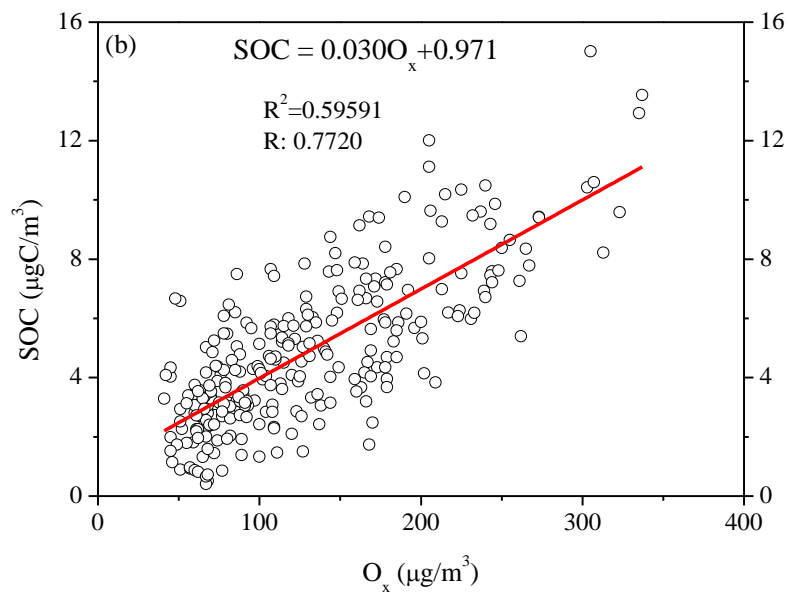

91

92 **Figure S5.** Linear correlation between SOC and  $O_x$  concentration.

93
