# Supplementary material for: Temporal variations of the hygroscopicity and mixing state of black carbon aerosols in a polluted megacity area
Source: Copernicus journal article supplement (doi:10.5194/acp-2018-602), 2018-06-25
Supplement: Supplementary file [file acp-2018-602-RC1-supplement.pdf]

General: Extensive study of the variability in state of mixing of urban BC particles and other material with new results.

Language: The English formulations need substantial improvements. Several examples are pointed out in the list of detailed comments.

Citations: The cited literature is mostly rather recent, predominantly Chinese, and more than necessary from the own authorship, disregarding original findings and reports.

Examples are given in the list of detailed comments.

Recommendation: Accept after addressing the list of detailed comments, thorough language editing and literature review.

| Line | Comment                                                                                                                                                                                                                                             |
|------|-----------------------------------------------------------------------------------------------------------------------------------------------------------------------------------------------------------------------------------------------------|
| 63   | Chemical composition and „mixing state“ are not the same, c.f. (Heintzenberg and Covert, 1990)                                                                                                                                                      |
| 66   | is determined                                                                                                                                                                                                                                       |
| 66   | composition                                                                                                                                                                                                                                         |
| 67   | Heintzenberg & Covert 1990 precedes the cited literature by more than 20 years                                                                                                                                                                      |
| 74   | Who is “it”? Obscure sentence                                                                                                                                                                                                                       |
| 82   | “ambient BC particles externally and internally mixed BC particles”: Obscure formulation                                                                                                                                                            |
| 99   | pollutant                                                                                                                                                                                                                                           |
| 127  | Sentence beginning here is missing a verb                                                                                                                                                                                                           |
| 140  | What is the collection efficiency of the SPAMS, e.g., at its lower size limit of 200 nm?                                                                                                                                                            |
| 173  | “primary aerosol emission”: obscure formulation                                                                                                                                                                                                     |
| 198  | Fig. 2 starts at 2017-07-01 instead of 2017-07-04 as in the text and as more suitable for illustrating the TDMA-SP2” sampling intervals, which should be marked in the figure                                                                       |
| 245  | How do you define “total”? Total samples or truly total ambient? If the latter where does your ambient reference come from?                                                                                                                         |
| 275  | The hydrolysis of N <sub>2</sub> O <sub>5</sub> has been described decades before, e.g., Mozurkewich, M., and J. G. Calvert, Reaction probabilities of N <sub>2</sub> O <sub>5</sub> on aqueous aerosols, J. Geophys. Res., 93, 15,889–15,896, 1988 |
| 284  | “It is known that BC particles originated from traffic emissions are small”. Yes but known before the cited Chinese reference                                                                                                                       |
| 291  | Proportions                                                                                                                                                                                                                                         |
| 305  | If you compare the volume of the coating instead of the coating thickness with varying core diameter you might come to a different conclusion                                                                                                       |
| 315  | How low is the “low efficiency”?                                                                                                                                                                                                                    |

## Literature

Heintzenberg, J., Covert, D.S., 1990. On the distribution of physical and chemical particle properties in the atmospheric aerosol. J. Atmos. Chem. 10, 383-397.
